# Supplementary material for: Plasmolysis: Loss of Turgor and Beyond
Source: MDPI journal article supplement (doi:10.3390/plants3040583), 2014-11-26
Supplement: s1 [file s1]

Archive with 5 entries (4 files):
- plants-03-00583-Supplement/
- plants-03-00583-Supplement/Supplemental Material & Figure S1.pdf
- plants-03-00583-Supplement/Supplemental Movie S1-Lang I et al_2014.m2v
- plants-03-00583-Supplement/Supplemental Movie S2-Lang et al_2014.m2v
- plants-03-00583-Supplement/Supplemental Movie S3-Lang et al 2014.avi
